# Supplementary material
Source: Springer Nature journal article supplement (https://www.springermedizin.de/resource/supplementary/12885_2010_2253_MOESM6_ESM.pdf/9460862)

Specimen\_001-2 Presort

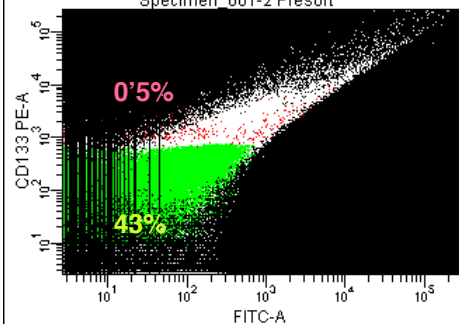

Specimen\_001-6 Presort

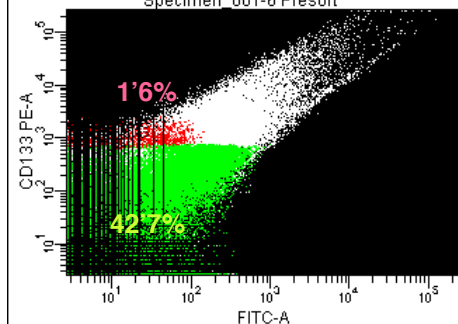

Specimen\_001-9 Presort

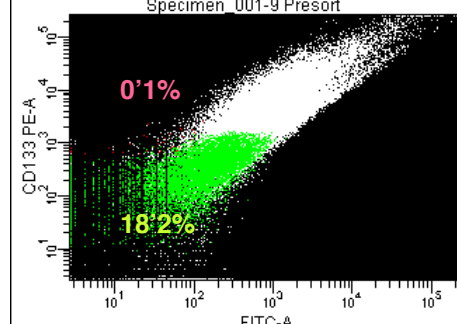

Specimen\_001-4 Presort

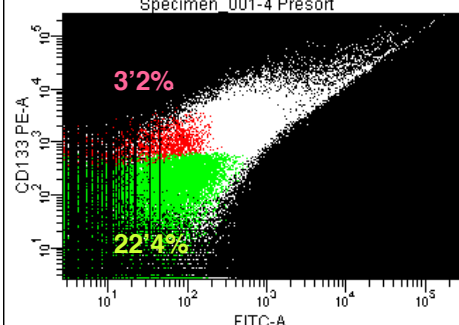

Specimen\_001-7 Presort

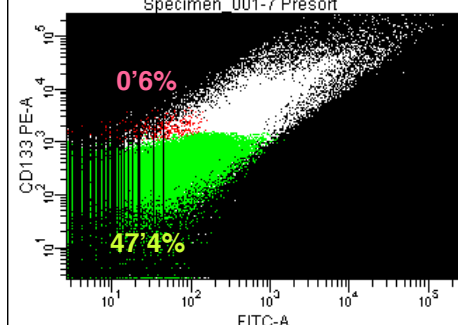

Specimen\_001-11 Presort

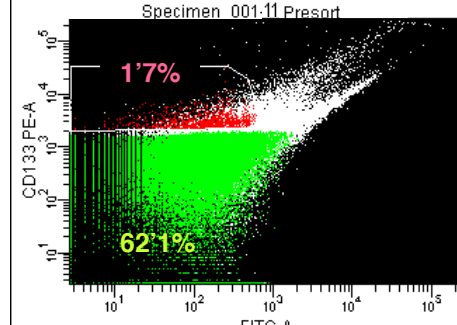

Specimen\_001-5 Presort

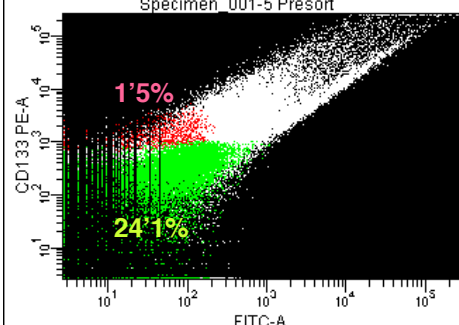

Specimen\_001-8 Presort

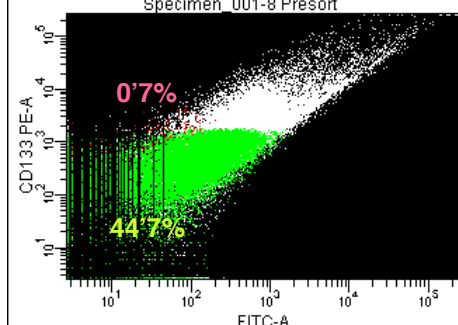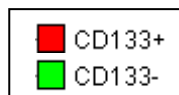

Supplement: MOESM6 [file 9460862]
